# Supplementary material for: Transcription Termination and Chimeric RNA Formation Controlled by Arabidopsis thaliana FPA
Source: PLOS journal article supplement (doi:10.1371/journal.pgen.1003867), 2013-10-31
Supplement: S3 (10.1371/journal.pgen.1003867.s003) [file journal.pgen.1003867.s003]

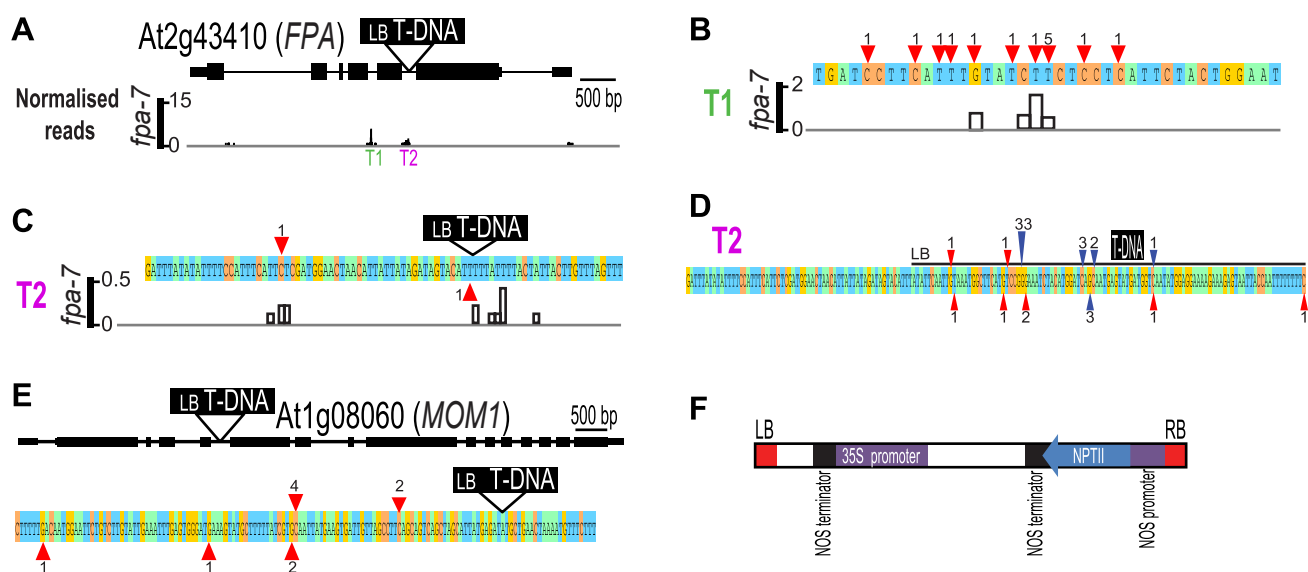

Figure S3. Analysis of alternatively polyadenylated transcripts.
