# Supplementary material for: Transcription Termination and Chimeric RNA Formation Controlled by Arabidopsis thaliana FPA
Source: PLOS journal article supplement (doi:10.1371/journal.pgen.1003867), 2013-10-31
Supplement: S12 (10.1371/journal.pgen.1003867.s012) [file journal.pgen.1003867.s012]

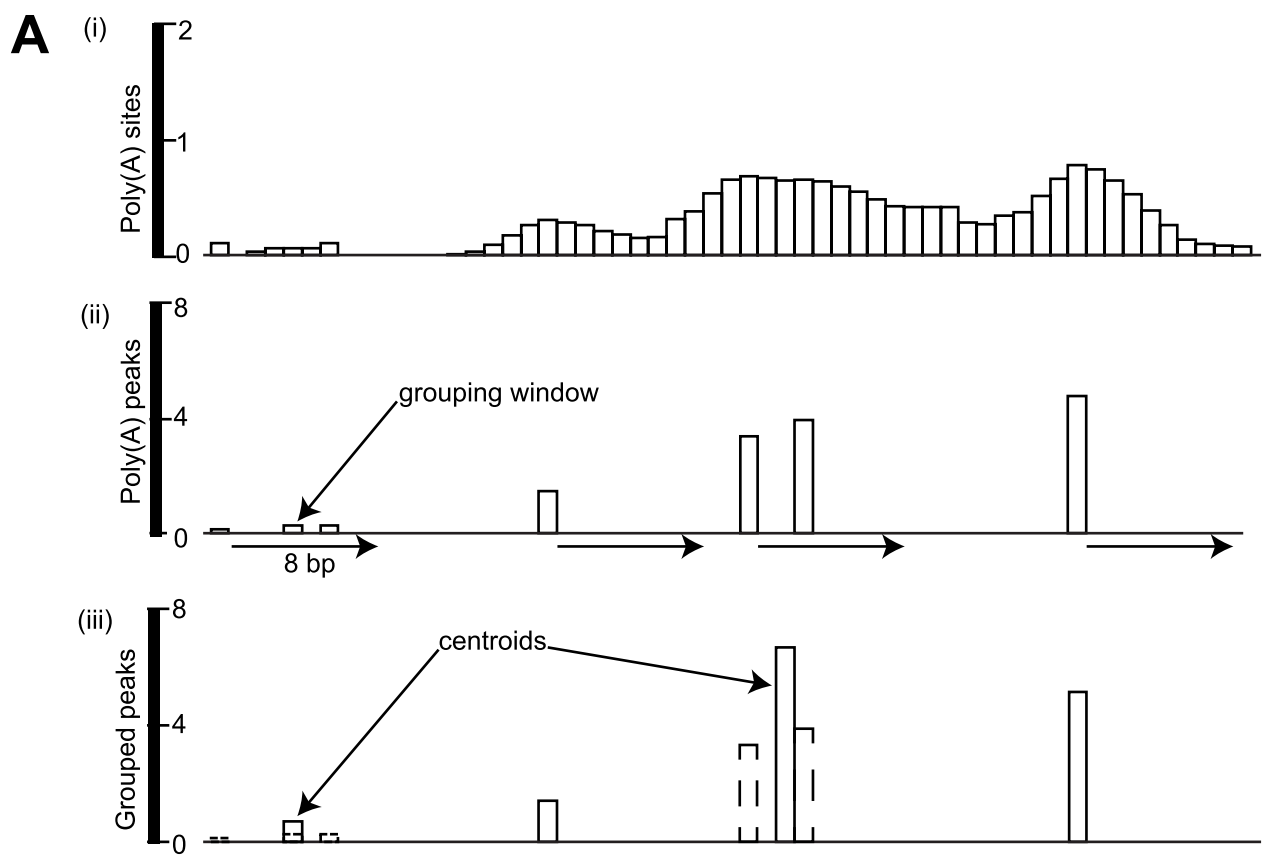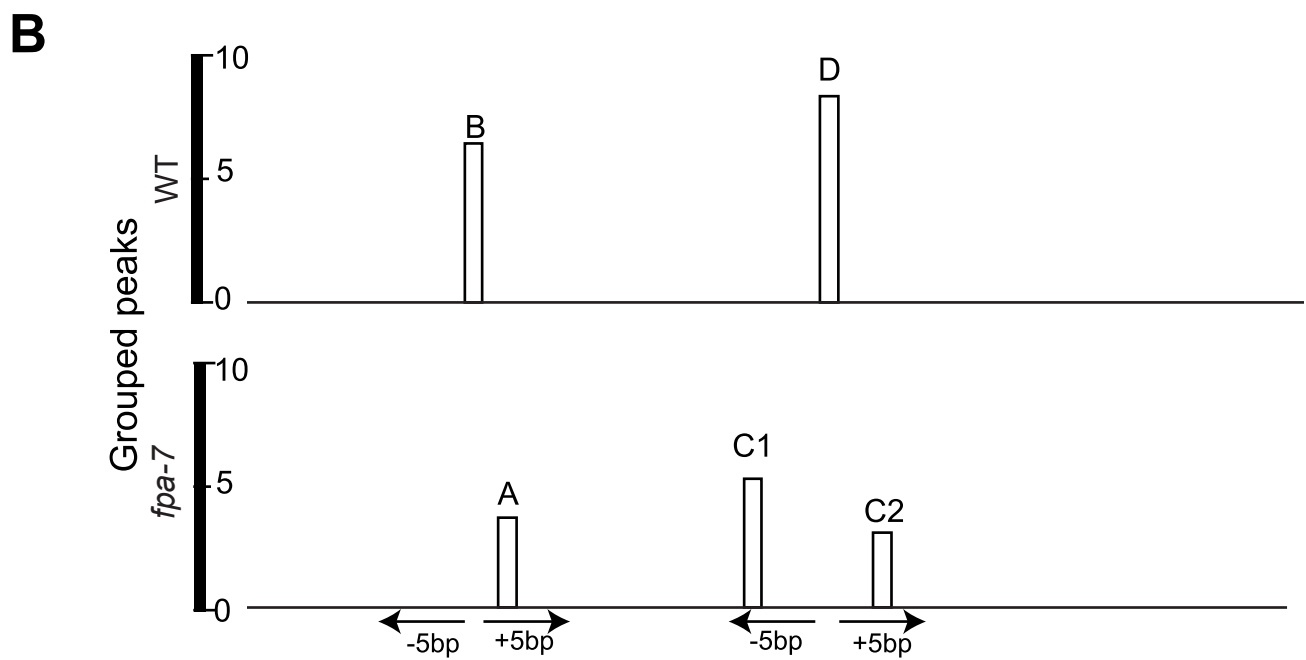

Figure S12. Illustration of peak grouping and peak matching algorithms.
