# Supplementary material for: Transcription Termination and Chimeric RNA Formation Controlled by Arabidopsis thaliana FPA
Source: PLoS Genet. 2013 Oct 31;9(10):e1003867. doi: 10.1371/journal.pgen.1003867 (PMC3814327; doi:10.1371/journal.pgen.1003867)
Supplement: Table S6 — List of the intergenic regions with differentially expressed peaks in fpa-7. Normalised reads (reads per million, RPM) are displayed. * When the antisense gene is not expressed, N/A is indicated. (XLSX) [file pgen.1003867.s019.xlsx]

## Sheet: S6. DE peaks
Table S6. List of the Intergenic Regions with Differentially Expressed peaks in fpa-7. Normalised reads (RPM) are displayed for WT and fpa
* When the antisense gene is not expressed, N/A is indicated.
Gene ID	Strand	Peak coordinates	Peak Expression in fpa-7 (RPM)	Antisense gene	Antisense gene p-value	WT Gene Expression (RPM)	fpa-7 Gene Expression (RPM)
At1g02680	fwd	583142	2	no antisense gene
At1g10820	rev	3599119	1.51	no antisense gene
At1g18250	rev	6271689	1.31	no antisense gene
At1g24040	rev	8502769	1.02	no antisense gene
At1g28140	rev	9829948	4.44	no antisense gene
At1g28140	rev	9830021	0.84	no antisense gene
At1g28140	rev	9829642	9.9	no antisense gene
At1g28140	rev	9829628	1.02	no antisense gene
At1g29530	rev	10324259	1.06	At1g29520	0.9698	6.07256	5.74157
At1g29530	rev	10323565	0.86	no antisense gene
At1g31920	rev	11454105	4.68	no antisense gene
At1g32520	rev	11757097	1.79	At1g32510		N/A	N/A
At1g36390	rev	13700802	2.03	no antisense gene
At1g45474	fwd	17183042	1.23	no antisense gene
At1g48970	rev	18112370	2.85	no antisense gene
At1g48970	rev	18112386	1.07	no antisense gene
At1g49975	fwd	18506149	5.73	no antisense gene
At1g50320	rev	18636805	1.65	At1g50310		N/A	N/A
At1g50320	rev	18636837	0.81	At1g50310		N/A	N/A
At1g52230	fwd	19456337	14.42	At1g52240	0.8428	1.46273	1.88652
At1g52670	rev	19612502	2.32	At1g52650	1	0.975155	1.14831
At1g53450	rev	19947633	2.25	At1g53440	0.06604	6.56014	10.2528
At1g54780	fwd	20443679	14.71	At1g54790	1	0.709204	0.574157
At1g54780	fwd	20441993	2.98	At1g54790	1	0.709204	0.574157
At1g54780	fwd	20443708	1.7	At1g54790	1	0.709204	0.574157
At1g54780	fwd	20443694	0.94	At1g54790	1	0.709204	0.574157
At1g61790	fwd	22816723	2.22	no antisense gene
At1g61790	fwd	22816881	2.02	no antisense gene
At1g62250	rev	22994487	9.68	no antisense gene
At1g71310	rev	26877702	2.92	At1g71300		N/A	N/A
At1g73470	fwd	27628175	2.09	no antisense gene
At1g73470	fwd	27628255	1.03	no antisense gene
At1g73470	fwd	27628199	2.93	no antisense gene
At1g78180	fwd	29419232	5.6	no antisense gene
At1g78180	fwd	29419120	3.03	no antisense gene
At1g78890	fwd	29658662	3.18	At1g78895	0.415	12.2781	9.59662
At1g78890	fwd	29658642	2.37	At1g78895	0.415	12.2781	9.59662
At2g04842	rev	1697897	3.13	At2g04840	1	N/A	N/A
At2g04842	rev	1697916	2.1	At2g04840	1	N/A	N/A
At2g05620	rev	2080306	4.1	no antisense gene
At2g16510	rev	7159415	1.21	no antisense gene
At2g16510	rev	7158944	4.04	no antisense gene
At2g17530	fwd	7633801	2.31	no antisense gene
At2g17530	fwd	7633624	2.23	no antisense gene
At2g19540	fwd	8464984	1.83	At2g19550		N/A	N/A
At2g25100	rev	10673833	1.8	no antisense gene
At2g25100	rev	10675161	2.57	no antisense gene
At2g25100	rev	10675380	0.96	no antisense gene
At2g25100	rev	10673955	5.39	no antisense gene
At2g35410	fwd	14900721	4.67	no antisense gene
At2g39800	rev	16596721	1.52	no antisense gene
At2g39800	rev	16596703	4.94	no antisense gene
At2g40960	fwd	17098735	0.95	no antisense gene
At2g40960	fwd	17098761		no antisense gene
At2g40960	fwd	17098810		no antisense gene
At2g43030	fwd	17895992	1.07	At2g43040	0.8618	1.32976	0.984269
At3g04790	fwd	1315282	3.88	no antisense gene
At3g11560	fwd	3646714	2.87	At3g11570		N/A	N/A
At3g11560	fwd	3646669	4.05	At3g11570		N/A	N/A
At3g15730	fwd	5334563	2.23	no antisense gene
At3g16140	rev	5468019	14.07	At3g16130		N/A	N/A
At3g16140	rev	5468010	23.17	At3g16130		N/A	N/A
At3g17040	rev	5808688	2.51	no antisense gene
At3g17040	rev	5808710	4.47	no antisense gene
At3g17040	rev	5808679	3.87	no antisense gene
At3g21055	rev	7375004	1.54	no antisense gene
At3g21055	rev	7374886	2.34	no antisense gene
At3g21055	rev	7374984	0.87	no antisense gene
At3g21055	rev	7375022	1.53	no antisense gene
At3g21220	fwd	7449229	2.87	At3g21230	0.01655	6.16121	2.99382
At3g27270	fwd	10076474	3.08	no antisense gene
At3g27460	rev	10158190	6.97	no antisense gene
At3g28370	fwd	10626178	4.28	At3g28380		N/A	N/A
At3g28370	fwd	10626244	1.5	At3g28380		N/A	N/A
At3g45050	fwd	16480810	1.65	no antisense gene
At3g45050	fwd	16480754	1.79	no antisense gene
At3g49470	fwd	18343240	2.52	At3g49480		N/A	N/A
At3g49470	fwd	18343649	1.26	no antisense gene
At3g51420	fwd	19086267	2.83	no antisense gene
At3g51510	fwd	19110373	8.75	no antisense gene
At3g51650	fwd	19163283	1.88	no antisense gene
At3g56140	fwd	20833361	4	no antisense gene
At3g58700	fwd	21713103	2.74	no antisense gene
At4g01690	fwd	732872	2.74	At4g01700	0.09061	2.48221	0.984269
At4g01690	fwd	732990	8.11	At4g01700	0.09061	2.48221	0.984269
At4g02920	fwd	1295268	6.03	no antisense gene
At4g02920	fwd	1295244	5.43	no antisense gene
At4g04320	fwd	2117039	1.65	At4g04330	4.514e-08	67.1084	112.781
At4g04640	rev	2349293	1.73	no antisense gene
At4g10890	fwd	6693803	1.84	no antisense gene
At4g10890	fwd	6693812	2.09	no antisense gene
At4g16410	rev	9261174	4.27	At4g16400	0.9206	1.90599	1.59944
At4g23890	rev	12418090	1.55	At4g23882		N/A	N/A
At4g24660	rev	12721895	4.42	no antisense gene
At4g24660	rev	12721869	1.45	no antisense gene
At4g28290	rev	14011067	4.48	At4g28280		N/A	N/A
At4g28290	rev	14011100	1.7	At4g28280		N/A	N/A
At4g31720	rev	15349994	1.72	At4g31710		N/A	N/A
At4g37040	fwd	17458269	1.48	At4g37050		0.487578	N/A
At4g37040	fwd	17458586	0.94	At4g37050	1
At4g37040	fwd	17458310	1.44	At4g37050	1
At4g37040	fwd	17458253	1.73	At4g37050	1
At5g10700	rev	3377699	2.29	At5g10695	0.01195	9.75155	15.6663
At5g16780	rev	5516457	2.98	At5g16770	1	1.06381	1.18932
At5g17510	rev	5769251	3.33	At5g17500		N/A	N/A
At5g17530	fwd	5783185	3.049	At5g17540		N/A	N/A
At5g18140	fwd	6001958	0.91	no antisense gene
At5g20935	fwd	7106941	2.39	no antisense gene
At5g22620	rev	7517107	1.96	no antisense gene
At5g22620	rev	7517054	5.89	no antisense gene
At5g39250	fwd	15727206	2.53	At5g39260		N/A	N/A
At5g39250	fwd	15727224	2.08	At5g39260		N/A	N/A
At5g42765	rev	17148910	4.99	At5g42760	0.05468	14.9819	8.24325
At5g51020	rev	20744363	3.1	no antisense gene
At5g52780	rev	21386152	1.24	no antisense gene
At5g64170	rev	25671553	0.82	At5g64160	0.0749	13.4305	9.06347
At5g64170	rev	25671605	2.98	At5g64160	0.0749	13.4305	9.06347
